# Supplementary material for: Variable Correlation between Bronchoalveolar Lavage Fluid Fungal Load and Serum-(1,3)-β-d-Glucan in Patients with Pneumocystosis—A Multicenter ECMM Excellence Center Study
Source: PubMed Central journal article supplement (PMC7711754; doi:10.3390/jof6040327), 2020-12-01
Supplement: jof-06-00327-s001.pdf [file jof-06-00327-s001.pdf]

## Supplementary Materials

Table S1.

|          | qPCR assay evaluation (PMID) | Manufacturer       | Extraction method                                                                                                                                                                                                                                                          |
|----------|------------------------------|--------------------|----------------------------------------------------------------------------------------------------------------------------------------------------------------------------------------------------------------------------------------------------------------------------|
| Center 1 | 19846641                     | In house           | Extraction from 1 mL of sample using NucliSens easyMAG/eMAG (BioMérieux, France)<br>Pretreatment and lysis in GuSCN-buffer<br>Binding to silica coated magnetic beads<br>Elution into final volume of 50 µL                                                                |
| Center 2 | 20946413                     | In house           | No bead beating<br>Qiasymphony (Qiagen)<br>Virus Pathogen extraction kit (Qiagen)<br>Extracted volume (1mL)<br>Elution 85µL                                                                                                                                                |
| Center 3 | 31758173                     | RidaGene           | Extraction from 500 µl of BAL fluid using the NucliSENS® easyMAG® instrument (specific B protocol). The elution volume was 50 µl.<br>Amplification and detection using the RIDA®GENE Pneumocystis jirovecii kit according to the manufacturer's instructions (r-Biopharm). |
| Center 4 | 30430780                     | Altona Diagnostics | No beat beating; pretreatment with Sputasol (Oxoid LTD, Hamshire, England), 300 ul sample; Extraction in Maxwell 16 instrument (Promega GmbH, Walldorf, Germany); Elution 50 ul                                                                                            |
| Center 5 | 1974987                      | Tibmolbiol         | High Pure Viral Nucleic Acid Kit (Roche); extraction volume 200 µL                                                                                                                                                                                                         |

Table S2: ROC curve sensibility and specificity data for BAL qPCR.

|         | Sensitivity% | 95% CI           | Specificity% | 95% CI             | Likelihood ratio |
|---------|--------------|------------------|--------------|--------------------|------------------|
| > 17.57 | 100,0        | 88,65% to 100,0% | 0,8547       | 0,04384% to 4,683% | 1,009            |
| > 19.46 | 100,0        | 88,65% to 100,0% | 1,709        | 0,3037% to 6,019%  | 1,017            |
| > 20.01 | 100,0        | 88,65% to 100,0% | 2,564        | 0,6989% to 7,268%  | 1,026            |
| > 20.10 | 100,0        | 88,65% to 100,0% | 3,419        | 1,337% to 8,462%   | 1,035            |
| > 20.45 | 100,0        | 88,65% to 100,0% | 4,274        | 1,839% to 9,615%   | 1,045            |
| > 20.87 | 100,0        | 88,65% to 100,0% | 5,128        | 2,371% to 10,74%   | 1,054            |
| > 21.38 | 100,0        | 88,65% to 100,0% | 7,692        | 4,100% to 13,97%   | 1,083            |
| > 21.79 | 100,0        | 88,65% to 100,0% | 8,547        | 4,709% to 15,02%   | 1,093            |
| > 21.89 | 100,0        | 88,65% to 100,0% | 9,402        | 5,331% to 16,05%   | 1,104            |
| > 22.00 | 100,0        | 88,65% to 100,0% | 11,11        | 6,609% to 18,09%   | 1,125            |
| > 22.12 | 100,0        | 88,65% to 100,0% | 11,97        | 7,263% to 19,09%   | 1,136            |
| > 22.27 | 100,0        | 88,65% to 100,0% | 12,82        | 7,926% to 20,08%   | 1,147            |
| > 22.62 | 100,0        | 88,65% to 100,0% | 13,68        | 8,596% to 21,06%   | 1,158            |
| > 22.95 | 100,0        | 88,65% to 100,0% | 14,53        | 9,274% to 22,04%   | 1,170            |
| > 23.15 | 100,0        | 88,65% to 100,0% | 16,24        | 10,65% to 23,98%   | 1,194            |
| > 23.65 | 100,0        | 88,65% to 100,0% | 17,09        | 11,35% to 24,93%   | 1,206            |
| > 24.10 | 100,0        | 88,65% to 100,0% | 19,66        | 13,47% to 27,77%   | 1,245            |
| > 24.23 | 100,0        | 88,65% to 100,0% | 20,51        | 14,19% to 28,71%   | 1,258            |
| > 24.46 | 100,0        | 88,65% to 100,0% | 21,37        | 14,91% to 29,64%   | 1,272            |
| > 24.83 | 100,0        | 88,65% to 100,0% | 22,22        | 15,64% to 30,57%   | 1,286            |
| > 25.37 | 100,0        | 88,65% to 100,0% | 23,08        | 16,37% to 31,49%   | 1,300            |
| > 25.80 | 100,0        | 88,65% to 100,0% | 23,93        | 17,11% to 32,41%   | 1,315            |
| > 25.90 | 100,0        | 88,65% to 100,0% | 24,79        | 17,85% to 33,33%   | 1,330            |
| > 25.99 | 100,0        | 88,65% to 100,0% | 30,77        | 23,13% to 39,63%   | 1,444            |
| > 26.02 | 100,0        | 88,65% to 100,0% | 31,62        | 23,90% to 40,52%   | 1,463            |
| > 26.08 | 100,0        | 88,65% to 100,0% | 32,48        | 24,67% to 41,40%   | 1,481            |

|         |       |                  |       |                  |       |
|---------|-------|------------------|-------|------------------|-------|
| > 26.54 | 100,0 | 88,65% to 100,0% | 33,33 | 25,44% to 42,28% | 1,500 |
| > 26.96 | 100,0 | 88,65% to 100,0% | 34,19 | 26,22% to 43,16% | 1,519 |
| > 26.97 | 100,0 | 88,65% to 100,0% | 35,04 | 27,00% to 44,04% | 1,539 |
| > 26.98 | 100,0 | 88,65% to 100,0% | 38,46 | 30,15% to 47,51% | 1,625 |
| > 27.06 | 100,0 | 88,65% to 100,0% | 39,32 | 30,94% to 48,37% | 1,648 |
| > 27.26 | 100,0 | 88,65% to 100,0% | 40,17 | 31,74% to 49,23% | 1,671 |
| > 27.46 | 100,0 | 88,65% to 100,0% | 41,03 | 32,54% to 50,09% | 1,696 |
| > 27.61 | 100,0 | 88,65% to 100,0% | 41,88 | 33,34% to 50,94% | 1,721 |
| > 27.72 | 96,67 | 83,33% to 99,83% | 41,88 | 33,34% to 50,94% | 1,663 |
| > 27.83 | 96,67 | 83,33% to 99,83% | 42,74 | 34,14% to 51,79% | 1,688 |
| > 27.93 | 96,67 | 83,33% to 99,83% | 43,59 | 34,95% to 52,64% | 1,714 |
| > 27.97 | 96,67 | 83,33% to 99,83% | 44,44 | 35,76% to 53,48% | 1,740 |
| > 28.04 | 96,67 | 83,33% to 99,83% | 52,14 | 43,16% to 60,98% | 2,020 |
| > 28.19 | 96,67 | 83,33% to 99,83% | 52,99 | 44,00% to 61,80% | 2,056 |
| > 28.38 | 96,67 | 83,33% to 99,83% | 53,85 | 44,83% to 62,61% | 2,094 |
| > 28.49 | 96,67 | 83,33% to 99,83% | 54,70 | 45,67% to 63,43% | 2,134 |
| > 28.69 | 93,33 | 78,68% to 98,82% | 54,70 | 45,67% to 63,43% | 2,060 |
| > 28.93 | 93,33 | 78,68% to 98,82% | 55,56 | 46,52% to 64,24% | 2,100 |
| > 29.02 | 93,33 | 78,68% to 98,82% | 59,83 | 50,77% to 68,26% | 2,323 |
| > 29.11 | 93,33 | 78,68% to 98,82% | 60,68 | 51,63% to 69,06% | 2,374 |
| > 29.22 | 93,33 | 78,68% to 98,82% | 61,54 | 52,49% to 69,85% | 2,427 |
| > 29.37 | 90,00 | 74,38% to 96,54% | 61,54 | 52,49% to 69,85% | 2,340 |
| > 29.64 | 90,00 | 74,38% to 96,54% | 62,39 | 53,35% to 70,64% | 2,393 |
| > 29.89 | 90,00 | 74,38% to 96,54% | 63,25 | 54,22% to 71,43% | 2,449 |
| > 29.97 | 90,00 | 74,38% to 96,54% | 64,10 | 55,09% to 72,22% | 2,507 |
| > 30.00 | 90,00 | 74,38% to 96,54% | 66,67 | 57,72% to 74,56% | 2,700 |
| > 30.10 | 90,00 | 74,38% to 96,54% | 67,52 | 58,60% to 75,33% | 2,771 |
| > 30.21 | 90,00 | 74,38% to 96,54% | 68,38 | 59,48% to 76,10% | 2,846 |
| > 30.26 | 90,00 | 74,38% to 96,54% | 69,23 | 60,37% to 76,87% | 2,925 |
| > 30.43 | 90,00 | 74,38% to 96,54% | 70,09 | 61,26% to 77,64% | 3,009 |
| > 30.60 | 90,00 | 74,38% to 96,54% | 70,94 | 62,15% to 78,40% | 3,097 |
| > 30.70 | 90,00 | 74,38% to 96,54% | 71,79 | 63,05% to 79,16% | 3,191 |
| > 30.82 | 90,00 | 74,38% to 96,54% | 72,65 | 63,95% to 79,91% | 3,291 |
| > 30.87 | 90,00 | 74,38% to 96,54% | 74,36 | 65,76% to 81,41% | 3,510 |
| > 30.89 | 90,00 | 74,38% to 96,54% | 76,07 | 67,59% to 82,89% | 3,761 |
| > 30.99 | 90,00 | 74,38% to 96,54% | 76,92 | 68,51% to 83,63% | 3,900 |
| > 31.18 | 90,00 | 74,38% to 96,54% | 77,78 | 69,43% to 84,36% | 4,050 |
| > 31.28 | 90,00 | 74,38% to 96,54% | 78,63 | 70,36% to 85,09% | 4,212 |
| > 31.29 | 86,67 | 70,32% to 94,69% | 78,63 | 70,36% to 85,09% | 4,056 |
| > 31.39 | 86,67 | 70,32% to 94,69% | 79,49 | 71,29% to 85,81% | 4,225 |
| > 31.53 | 86,67 | 70,32% to 94,69% | 80,34 | 72,23% to 86,53% | 4,409 |
| > 31.73 | 86,67 | 70,32% to 94,69% | 81,20 | 73,17% to 87,24% | 4,609 |
| > 31.93 | 86,67 | 70,32% to 94,69% | 82,05 | 74,11% to 87,95% | 4,829 |
| > 32.13 | 86,67 | 70,32% to 94,69% | 82,91 | 75,07% to 88,65% | 5,070 |
| > 32.28 | 86,67 | 70,32% to 94,69% | 83,76 | 76,02% to 89,35% | 5,337 |
| > 32.38 | 86,67 | 70,32% to 94,69% | 84,62 | 76,99% to 90,04% | 5,633 |
| > 32.48 | 86,67 | 70,32% to 94,69% | 85,47 | 77,96% to 90,73% | 5,965 |
| > 32.53 | 86,67 | 70,32% to 94,69% | 87,18 | 79,92% to 92,07% | 6,760 |
| > 32.59 | 86,67 | 70,32% to 94,69% | 88,03 | 80,91% to 92,74% | 7,243 |
| > 32.75 | 86,67 | 70,32% to 94,69% | 88,89 | 81,91% to 93,39% | 7,800 |
| > 32.94 | 83,33 | 66,44% to 92,66% | 88,89 | 81,91% to 93,39% | 7,500 |
| > 33.03 | 83,33 | 66,44% to 92,66% | 90,60 | 83,95% to 94,67% | 8,864 |
| > 33.13 | 83,33 | 66,44% to 92,66% | 91,45 | 84,98% to 95,29% | 9,750 |
| > 33.30 | 80,00 | 62,69% to 90,49% | 91,45 | 84,98% to 95,29% | 9,360 |
| > 33.46 | 76,67 | 59,07% to 88,21% | 91,45 | 84,98% to 95,29% | 8,970 |
| > 33.54 | 73,33 | 55,55% to 85,82% | 91,45 | 84,98% to 95,29% | 8,580 |

|         |       |                   |       |                  |       |
|---------|-------|-------------------|-------|------------------|-------|
| > 33.63 | 73,33 | 55,55% to 85,82%  | 92,31 | 86,03% to 95,90% | 9,533 |
| > 33.73 | 73,33 | 55,55% to 85,82%  | 93,16 | 87,09% to 96,49% | 10,73 |
| > 33.85 | 70,00 | 52,12% to 83,34%  | 93,16 | 87,09% to 96,49% | 10,24 |
| > 33.95 | 70,00 | 52,12% to 83,34%  | 94,02 | 88,16% to 97,07% | 11,70 |
| > 33.99 | 70,00 | 52,12% to 83,34%  | 95,73 | 90,38% to 98,16% | 16,38 |
| > 34.08 | 66,67 | 48,78% to 80,77%  | 95,73 | 90,38% to 98,16% | 15,60 |
| > 34.17 | 63,33 | 45,51% to 78,13%  | 95,73 | 90,38% to 98,16% | 14,82 |
| > 34.28 | 63,33 | 45,51% to 78,13%  | 96,58 | 91,54% to 98,66% | 18,53 |
| > 34.46 | 60,00 | 42,32% to 75,41%  | 96,58 | 91,54% to 98,66% | 17,55 |
| > 34.55 | 56,67 | 39,20% to 72,62%  | 96,58 | 91,54% to 98,66% | 16,58 |
| > 34.67 | 53,33 | 36,14% to 69,77%  | 96,58 | 91,54% to 98,66% | 15,60 |
| > 34.82 | 53,33 | 36,14% to 69,77%  | 97,44 | 92,73% to 99,30% | 20,80 |
| > 34.96 | 50,00 | 33,15% to 66,85%  | 97,44 | 92,73% to 99,30% | 19,50 |
| > 35.09 | 50,00 | 33,15% to 66,85%  | 98,29 | 93,98% to 99,70% | 29,25 |
| > 35.14 | 46,67 | 30,23% to 63,86%  | 98,29 | 93,98% to 99,70% | 27,30 |
| > 35.49 | 43,33 | 27,38% to 60,80%  | 98,29 | 93,98% to 99,70% | 25,35 |
| > 35.85 | 40,00 | 24,59% to 57,68%  | 98,29 | 93,98% to 99,70% | 23,40 |
| > 35.89 | 40,00 | 24,59% to 57,68%  | 99,15 | 95,32% to 99,96% | 46,80 |
| > 35.94 | 36,67 | 21,87% to 54,49%  | 99,15 | 95,32% to 99,96% | 42,90 |
| > 36.03 | 33,33 | 19,23% to 51,22%  | 99,15 | 95,32% to 99,96% | 39,00 |
| > 36.14 | 33,33 | 19,23% to 51,22%  | 100,0 | 96,82% to 100,0% |       |
| > 36.29 | 30,00 | 16,66% to 47,88%  | 100,0 | 96,82% to 100,0% |       |
| > 36.58 | 26,67 | 14,18% to 44,45%  | 100,0 | 96,82% to 100,0% |       |
| > 36.82 | 23,33 | 11,79% to 40,93%  | 100,0 | 96,82% to 100,0% |       |
| > 37.06 | 20,00 | 9,505% to 37,31%  | 100,0 | 96,82% to 100,0% |       |
| > 37.34 | 16,67 | 7,337% to 33,56%  | 100,0 | 96,82% to 100,0% |       |
| > 37.46 | 13,33 | 5,310% to 29,68%  | 100,0 | 96,82% to 100,0% |       |
| > 37.78 | 10,00 | 3,460% to 25,62%  | 100,0 | 96,82% to 100,0% |       |
| > 38.19 | 6,667 | 1,185% to 21,32%  | 100,0 | 96,82% to 100,0% |       |
| > 38.34 | 3,333 | 0,1710% to 16,67% | 100,0 | 96,82% to 100,0% |       |

Table S3: ROC curve sensibility and specificity data for BDG.

|         | Sensitivity% | 95% CI           | Specificity% | 95% CI           | Likelihood ratio |
|---------|--------------|------------------|--------------|------------------|------------------|
| < 8.350 | 26,67        | 14,18% to 44,45% | 100,0        | 96,82% to 100,0% |                  |
| < 9.070 | 30,00        | 16,66% to 47,88% | 100,0        | 96,82% to 100,0% |                  |
| < 9.365 | 33,33        | 19,23% to 51,22% | 100,0        | 96,82% to 100,0% |                  |
| < 10.53 | 36,67        | 21,87% to 54,49% | 100,0        | 96,82% to 100,0% |                  |
| < 12.23 | 40,00        | 24,59% to 57,68% | 100,0        | 96,82% to 100,0% |                  |
| < 13.50 | 46,67        | 30,23% to 63,86% | 100,0        | 96,82% to 100,0% |                  |
| < 14.70 | 46,67        | 30,23% to 63,86% | 99,15        | 95,32% to 99,96% | 54,60            |
| < 16.20 | 50,00        | 33,15% to 66,85% | 95,73        | 90,38% to 98,16% | 11,70            |
| < 17.10 | 50,00        | 33,15% to 66,85% | 94,87        | 89,26% to 97,63% | 9,750            |
| < 17.70 | 53,33        | 36,14% to 69,77% | 94,87        | 89,26% to 97,63% | 10,40            |
| < 19.60 | 56,67        | 39,20% to 72,62% | 94,87        | 89,26% to 97,63% | 11,05            |
| < 23.75 | 60,00        | 42,32% to 75,41% | 94,87        | 89,26% to 97,63% | 11,70            |
| < 27.75 | 60,00        | 42,32% to 75,41% | 94,02        | 88,16% to 97,07% | 10,03            |
| < 29.24 | 63,33        | 45,51% to 78,13% | 94,02        | 88,16% to 97,07% | 10,59            |
| < 29.74 | 66,67        | 48,78% to 80,77% | 94,02        | 88,16% to 97,07% | 11,14            |
| < 30.50 | 70,00        | 52,12% to 83,34% | 94,02        | 88,16% to 97,07% | 11,70            |
| < 31.15 | 70,00        | 52,12% to 83,34% | 87,18        | 79,92% to 92,07% | 5,460            |
| < 34.48 | 73,33        | 55,55% to 85,82% | 87,18        | 79,92% to 92,07% | 5,720            |
| < 38.96 | 73,33        | 55,55% to 85,82% | 86,32        | 78,94% to 91,40% | 5,363            |
| < 41.10 | 73,33        | 55,55% to 85,82% | 85,47        | 77,96% to 90,73% | 5,047            |
| < 42.60 | 73,33        | 55,55% to 85,82% | 84,62        | 76,99% to 90,04% | 4,767            |
| < 49.86 | 73,33        | 55,55% to 85,82% | 83,76        | 76,02% to 89,35% | 4,516            |
| < 64.49 | 73,33        | 55,55% to 85,82% | 82,91        | 75,07% to 88,65% | 4,290            |
| < 74.77 | 73,33        | 55,55% to 85,82% | 82,05        | 74,11% to 87,95% | 4,086            |
| < 78.42 | 76,67        | 59,07% to 88,21% | 82,05        | 74,11% to 87,95% | 4,271            |
| < 82.92 | 76,67        | 59,07% to 88,21% | 81,20        | 73,17% to 87,24% | 4,077            |
| < 89.00 | 80,00        | 62,69% to 90,49% | 81,20        | 73,17% to 87,24% | 4,255            |
| < 92.16 | 83,33        | 66,44% to 92,66% | 81,20        | 73,17% to 87,24% | 4,432            |
| < 92.66 | 83,33        | 66,44% to 92,66% | 80,34        | 72,23% to 86,53% | 4,239            |
| < 93.70 | 83,33        | 66,44% to 92,66% | 79,49        | 71,29% to 85,81% | 4,063            |
| < 96.00 | 86,67        | 70,32% to 94,69% | 79,49        | 71,29% to 85,81% | 4,225            |
| < 97.66 | 90,00        | 74,38% to 96,54% | 79,49        | 71,29% to 85,81% | 4,388            |
| < 100.2 | 90,00        | 74,38% to 96,54% | 78,63        | 70,36% to 85,09% | 4,212            |
| < 109.7 | 90,00        | 74,38% to 96,54% | 77,78        | 69,43% to 84,36% | 4,050            |
| < 128.3 | 93,33        | 78,68% to 98,82% | 77,78        | 69,43% to 84,36% | 4,200            |
| < 144.1 | 96,67        | 83,33% to 99,83% | 77,78        | 69,43% to 84,36% | 4,350            |
| < 148.6 | 96,67        | 83,33% to 99,83% | 76,92        | 68,51% to 83,63% | 4,189            |
| < 150.7 | 96,67        | 83,33% to 99,83% | 76,07        | 67,59% to 82,89% | 4,039            |
| < 158.0 | 96,67        | 83,33% to 99,83% | 75,21        | 66,67% to 82,15% | 3,900            |
| < 173.8 | 96,67        | 83,33% to 99,83% | 74,36        | 65,76% to 81,41% | 3,770            |
| < 185.2 | 96,67        | 83,33% to 99,83% | 73,50        | 64,85% to 80,66% | 3,648            |
| < 188.8 | 96,67        | 83,33% to 99,83% | 72,65        | 63,95% to 79,91% | 3,534            |
| < 191.2 | 100,0        | 88,65% to 100,0% | 72,65        | 63,95% to 79,91% | 3,656            |
| < 191.5 | 100,0        | 88,65% to 100,0% | 71,79        | 63,05% to 79,16% | 3,545            |
| < 197.2 | 100,0        | 88,65% to 100,0% | 70,94        | 62,15% to 78,40% | 3,441            |
| < 205.3 | 100,0        | 88,65% to 100,0% | 70,09        | 61,26% to 77,64% | 3,343            |
| < 212.9 | 100,0        | 88,65% to 100,0% | 69,23        | 60,37% to 76,87% | 3,250            |
| < 222.0 | 100,0        | 88,65% to 100,0% | 68,38        | 59,48% to 76,10% | 3,162            |
| < 228.6 | 100,0        | 88,65% to 100,0% | 67,52        | 58,60% to 75,33% | 3,079            |
| < 234.7 | 100,0        | 88,65% to 100,0% | 66,67        | 57,72% to 74,56% | 3,000            |
| < 240.1 | 100,0        | 88,65% to 100,0% | 65,81        | 56,84% to 73,78% | 2,925            |
| < 242.8 | 100,0        | 88,65% to 100,0% | 64,96        | 55,96% to 73,00% | 2,854            |
| < 245.2 | 100,0        | 88,65% to 100,0% | 64,10        | 55,09% to 72,22% | 2,786            |

|         |       |                  |       |                  |       |
|---------|-------|------------------|-------|------------------|-------|
| < 262.3 | 100,0 | 88,65% to 100,0% | 63,25 | 54,22% to 71,43% | 2,721 |
| < 279.0 | 100,0 | 88,65% to 100,0% | 62,39 | 53,35% to 70,64% | 2,659 |
| < 298.1 | 100,0 | 88,65% to 100,0% | 61,54 | 52,49% to 69,85% | 2,600 |
| < 321.9 | 100,0 | 88,65% to 100,0% | 60,68 | 51,63% to 69,06% | 2,543 |
| < 328.9 | 100,0 | 88,65% to 100,0% | 59,83 | 50,77% to 68,26% | 2,489 |
| < 331.0 | 100,0 | 88,65% to 100,0% | 58,97 | 49,91% to 67,46% | 2,438 |
| < 334.4 | 100,0 | 88,65% to 100,0% | 58,12 | 49,06% to 66,66% | 2,388 |
| < 343.8 | 100,0 | 88,65% to 100,0% | 57,26 | 48,21% to 65,86% | 2,340 |
| < 350.9 | 100,0 | 88,65% to 100,0% | 56,41 | 47,36% to 65,05% | 2,294 |
| < 360.5 | 100,0 | 88,65% to 100,0% | 55,56 | 46,52% to 64,24% | 2,250 |
| < 376.7 | 100,0 | 88,65% to 100,0% | 54,70 | 45,67% to 63,43% | 2,208 |
| < 386.7 | 100,0 | 88,65% to 100,0% | 53,85 | 44,83% to 62,61% | 2,167 |
| < 401.0 | 100,0 | 88,65% to 100,0% | 52,99 | 44,00% to 61,80% | 2,127 |
| < 413.8 | 100,0 | 88,65% to 100,0% | 52,14 | 43,16% to 60,98% | 2,089 |
| < 427.0 | 100,0 | 88,65% to 100,0% | 51,28 | 42,33% to 60,15% | 2,053 |
| < 445.2 | 100,0 | 88,65% to 100,0% | 50,43 | 41,50% to 59,33% | 2,017 |
| < 464.2 | 100,0 | 88,65% to 100,0% | 49,57 | 40,67% to 58,50% | 1,983 |
| < 481.9 | 100,0 | 88,65% to 100,0% | 48,72 | 39,85% to 57,67% | 1,950 |
| < 489.2 | 100,0 | 88,65% to 100,0% | 47,86 | 39,02% to 56,84% | 1,918 |
| < 495.5 | 100,0 | 88,65% to 100,0% | 47,01 | 38,20% to 56,00% | 1,887 |
| < 507.2 | 100,0 | 88,65% to 100,0% | 41,88 | 33,34% to 50,94% | 1,721 |
| < 517.2 | 100,0 | 88,65% to 100,0% | 41,03 | 32,54% to 50,09% | 1,696 |
| < 522.0 | 100,0 | 88,65% to 100,0% | 40,17 | 31,74% to 49,23% | 1,671 |
